# Supplementary material
Source: publisher site journal article supplement (https://www.dovepress.com/article/278499)
Supplement: Supplementary file 1 [file get_supplementary_file.php]

**Supplemental file 1. Primers used for RQ-PCR**

| Primers | Sequence (5’ to 3’) |
| --- | --- |
| *circ-0002232* Forward | CTGGAAAGGGACGAACTGGT |
| *circ-0002232* Reverse | TCTCTTTGATGATGGCTGTCA |
| *miR-92a-3p* Forward | TATTGCACTTGTCCCGGCCTGT |
| *miR-92a-3p* Reverse | Manufacturer-provided miScript Universal primer |
| *PTEN* Forward | ACCCACCACAGCTAGAACTT |
| *PTEN* Reverse | CGCCTCTGACTGGGAATAGT |
| *ABL* Forward  *ABL* Reverse  *U6* Forward | TCCTCCAGCTGTTATCTGGAAGA  TCCAACGAGCGGCTTCAC  GTGCTCGCTTCGGCAGCACATATAC |
| *U6* Reverse | AAAATATGGAACGCTTCACGAATTTG |

**Supplemental file 2. Demographic data of controls and AML patients**

|  | Controls | AML patients |
| --- | --- | --- |
| Sex (Male/Female) | 8/40 | 73/42 |
| Median age, years (range) | 50(38-83) | 58(20-88) |
